# Supplementary material for: When the River Moves, Lives Shift: Linking Hydro-Geomorphology to Climate-Induced Migration
Source: Research Square preprint supplement (doi:10.21203/rs.3.rs-8332436/v1), 2026-01-07
Supplement: Supplementary file 1 [file 4d98d74b84aac6a20f0562ed.docx]

**Supplementary Table 1:** Logistic Regression Results for Effects of Education and Income on Migration Probability

| **Variable** | **Coef.**  β | **StdError** | **z** | **p_value** | **Odds Ratio**  (OR) | OR_95CI  (Lower) | **OR_95CI (Upper)** |
| --- | --- | --- | --- | --- | --- | --- | --- |
| **Intercept** | -1.0127 | 0.4513 | -2.24 | 0.0248 | 0.3632 | 0.15 | 0.8796 |
| **Education** | 0.6199 | 0.1619 | 3.83 | 0.0001 | 1.8588 | 1.3533 | 2.5531 |
| **Income** | -0.00005 | 0.00003 | -1.39 | 0.1633 | 1.0 | 0.9999 | 1.0 |

**Supplementary Table 2:** Accuracy Assessment of 2020 Land Cover Classification Using Confusion Matrix Metrics

| **Reference** | **Water** | **Sandy Bar** | **Stable Land** | **Row Total (Actual)** |
| --- | --- | --- | --- | --- |
| **Open Water** | 27 | 2 | 1 | 30 |
| **Sand land** | 3 | 39 | 6 | 48 |
| **Stable landmass** | 1 | 6 | 35 | 42 |
| **Column Total** | 31 | 47 | 42 | 120 |
